# Supplementary material
Source: publisher figshare collection journal article supplement (https://frontiersin.figshare.com/ndownloader/files/23012327)
Supplement: Supplementary file [file 23012327]

A

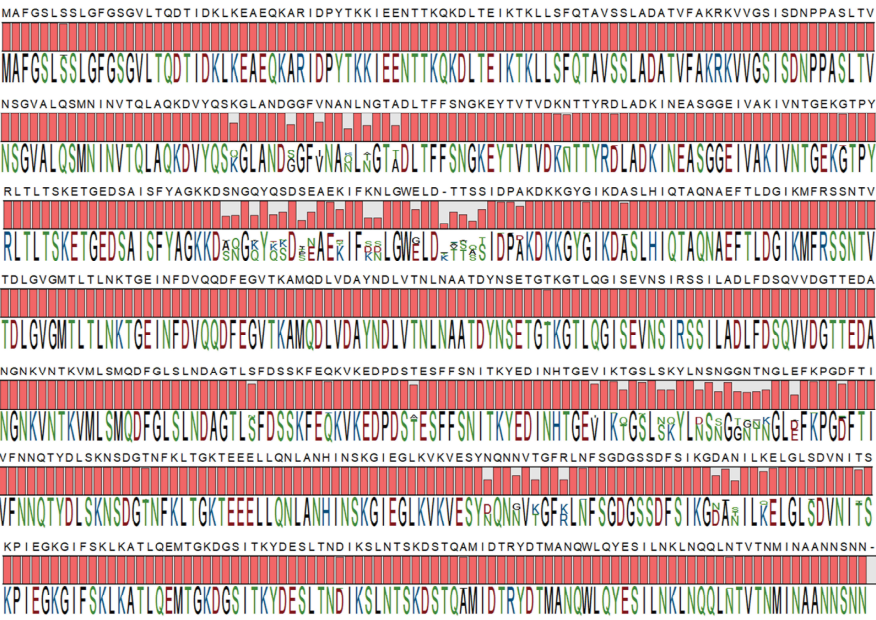

B

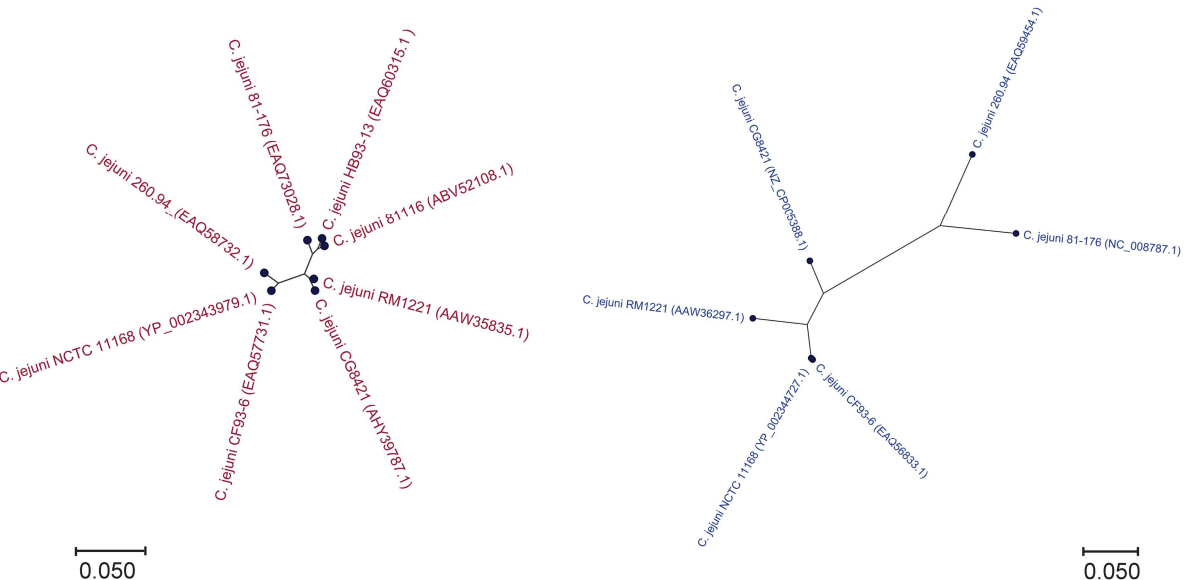

**Supplemental Figure 1. Analysis of FliD amino acid sequence conservation.**

(A) FliD amino acid sequences from 35 *C. jejuni* isolates were retrieved from GenBank and analyzed using CLC Main Workbench software (Qiagen). The red bars and the sequence logo underneath represent the percentage of conservation of each amino acid and the potential substitutions at the specific site. The consensus sequence for FliD is reported on top of each line. (B) Phylogenetic amino acid distance of FliD from different *C. jejuni* isolates previously described in literature (50-52) (left panel). Phylogenetic distance of flagellin subunit A (FlaA) for the same isolates is presented for comparison (right panel). The trees were generated using Neighbor-Joining method with Jukes-Cantor distance measurement.
